# Supplementary material for: Thiol–ene micropillar array electrospray ionization platform for zeptomole level bioanalysis
Source: Royal Society of Chemistry journal article supplement (doi:10.1039/c7an00544j), 2017-01-01
Supplement: c7an00544j1.pdf [file c7an00544j1.pdf]

## Supplementary Information

### Thiol-ene micropillar electrospray ionization platform for zeptomole level bioanalysis

K. Lipponen,<sup>a</sup> S. Tähkä,<sup>b</sup> T. Sikanen,<sup>c</sup> V. Jokinen,<sup>b</sup> A. Tatikonda,<sup>b</sup> S. Franssila,<sup>b</sup> R. Kostainen<sup>a</sup> and T. Kotiaho<sup>a,c,\*</sup>

<sup>a</sup>Drug Research Program, Division of Pharmaceutical Chemistry and Technology, Faculty of Pharmacy, P.O. Box 56, FIN-00014, University of Helsinki, Finland.

<sup>b</sup>Department of Chemistry and Materials Science, School of Chemical Engineering, P. O. Box 13500 (Aalto University), FI-00076 Aalto, Finland.

<sup>c</sup>Department of Chemistry, P.O. Box 55, FIN-00014, University of Helsinki, Finland.

\* Corresponding author, e-mail: [tapio.kotiaho@helsinki.fi](mailto:tapio.kotiaho@helsinki.fi)

#### Table of contents:

- Background mass spectrum.....S2
- Stability measurement.....S2

## Background mass spectrum

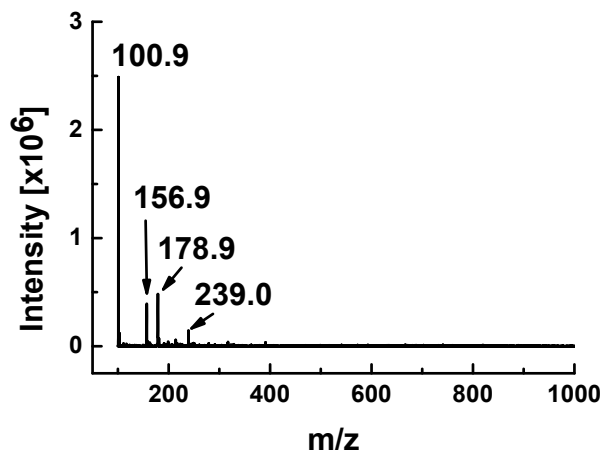

*Fig. S-1* Background mass spectrum (50:49:1 MeOH:H<sub>2</sub>O:HCOOH).

## Stability measurement

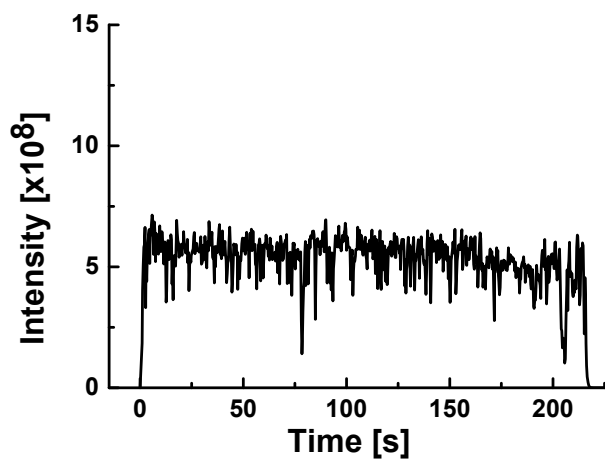

*Fig. S-2* Example of the stability of the ion current obtained by using the thiol-ene  $\mu$ PESI chip. Extracted ion profile of protonated verapamil  $[M+H]^+$  at  $m/z$   $455.2 \pm 0.3$ . Injection volume of 3  $\mu$ L (verapamil 5  $\mu$ M in 1% HCOOH).
